# Supplementary material for: Unprecedented one-pot sequential thiolate substitutions under mild conditions leading to a red emissive BODIPY dye 3,5,8-tris(PhS)-BODIPY
Source: Royal Society of Chemistry journal article supplement (doi:10.1039/c4ob01892c), 2014-11-19
Supplement: c4ob01892c1.pdf [file c4ob01892c1.pdf]

# Unprecedented, One-Pot, Sequential Thiolate Substitutions of 8-methylthio-BODIPY under Mild Conditions leading to a Red Emissive BODIPY Dye 3,5,8-tris(PhS)-BODIPY.

## Electronic Supplementary Information

Robinson Roacho<sup>1</sup>, Alejandro Metta-Magaña<sup>1</sup>, Eduardo Peña-Cabrera<sup>2</sup>, Keith Pannell<sup>1\*</sup>

<sup>1</sup>Department of Chemistry, University of Texas at El Paso. El Paso, Texas, 79968-0513, USA.

<sup>2</sup>Departamento de Química, Universidad de Guanajuato. Col. Noria Alta S/N. Guanajuato, Gto. 36050, Mexico.

Corresponding Author: Keith Pannell. [kpannell@utep.edu](mailto:kpannell@utep.edu)

### Table of Contents

|                                              |                                                                             |    |
|----------------------------------------------|-----------------------------------------------------------------------------|----|
| Experimental Details                         |                                                                             | 3  |
| Table 1.                                     | Summary of the optical properties of BODIPYs <b>2</b> , <b>3</b> , <b>4</b> | 4  |
| Figure 1.                                    | Absorbance (left) and emission spectra (right) of <b>2</b>                  | 5  |
| <b>3,8-bis(phenylthio)BODIPY <b>3</b></b>    |                                                                             |    |
| Figure 2                                     | <sup>1</sup> H NMR                                                          | 6  |
| Figure 3                                     | <sup>1</sup> H NMR expanded                                                 | 7  |
| Figure 4                                     | <sup>19</sup> F NMR                                                         | 8  |
| Figure 5                                     | <sup>13</sup> C NMR                                                         | 9  |
| <b>3,5,8-tris(phenylthio)BODIPY <b>4</b></b> |                                                                             |    |
| Figure 6                                     | <sup>1</sup> H NMR                                                          | 10 |
| Figure 7                                     | <sup>1</sup> H NMR expanded                                                 | 11 |
| Figure 8                                     | <sup>19</sup> F NMR                                                         | 12 |
| Figure 9                                     | <sup>13</sup> C NMR                                                         | 13 |
| <b>8-ethylthio-BODIPY <b>4</b></b>           |                                                                             |    |

|                                                               |                           |    |
|---------------------------------------------------------------|---------------------------|----|
| Figure 10                                                     | $^1\text{H}$ NMR          | 14 |
| Figure 11                                                     | $^1\text{H}$ NMR expanded | 15 |
| Figure 12                                                     | $^{19}\text{F}$ NMR       | 16 |
| Figure 13                                                     | $^{13}\text{C}$ NMR       | 17 |
| Crystal Packing Aspects of <b>2</b> , <b>3</b> , and <b>4</b> |                           | 18 |

## Experimental

Compound 2 was synthesized by reacting **1** (50 mg, 0.21 mmol purchased from Cuantico de Mexico, (Guanajuato, Mexico) with 1.5 eq. of PhSH in dry dichloromethane under nitrogen atmosphere. After 6 hours of stirring at room temperature silica gel thin-layer chromatography indicated that the reaction was finished. The product was purified by silica gel column chromatography using a 30/70% EtOAc/Hexanes solvent system. The final product was recrystallized from a dichloromethane/hexane mixture.

Compounds 3 and 4 were synthesized by reacting **1** (50 mg, 0.21 mmol) with 3 eq. of phenylthiol in dry tetrahydrofuran under nitrogen atmosphere. After 6 hours of stirring at room temperature silica gel thin-layer chromatography indicated that compound **3** was formed. Further stirring for 48 hours produced compound **4**. The products were purified by silica gel column chromatography using 30/70% EtOAc/Hexanes. The final products were recrystallized from a dichloromethane/hexane mixture. The same results were obtained by reacting **2** with PhSH under identical conditions.

Compound 5 was synthesized by reacting **1** (50 mg, 0.21 mmol purchased from Cuantico de Mexico, Guanajuato, Mexico) with 1.5 eq. of EtSH in tetrahydrofuran under nitrogen atmosphere. After 6 hours of stirring at room temperature silica gel thin-layer chromatography indicated that the reaction was finished. The product was purified by silica gel column chromatography using 30/70% EtOAc/Hexane solvent system. The final products were recrystallized from a dichloromethane/hexane mixture.

**2**: Orange crystals, yield 94%, 59.2 mg; m.pt. 134-135°C; <sup>1</sup>H NMR (CDCl<sub>3</sub>) δ 6.37-6.38 (d, 2H, J = 5.28 Hz), 6.95 (d, 2H, J = 4.08 Hz), 7.40-7.45 (m, 3H), 7.60 (d, 2H, J = 7.56 Hz), 7.75 (s, 2H). <sup>13</sup>C NMR (CDCl<sub>3</sub>) 118.0 (CH), 126.8 (CH), 130.0 (CH), 130.3 (CH), 131.9 (C), 133.1 (CH), 134.2 (C), 142.1 (CH), 150.0 (C). <sup>19</sup>F NMR (CDCl<sub>3</sub>) -145.5 (m). Anal. Calcd. for C<sub>15</sub>H<sub>11</sub>BF<sub>2</sub>N<sub>2</sub>S: C, 60.03; H, 3.69. Found: C, 60.14; H, 3.95.

**3**: Red crystals, yield 59%, 51.4 mg; m.p. 163-164°C; <sup>1</sup>H NMR (CDCl<sub>3</sub>) δ 5.78 (d, 1H, J = 4.8 Hz), 6.34 (s, 1H), 6.92 (d, 1H, J = 3.42 Hz), 7.07 (d, 1H, 4.8 Hz), 7.30-7.32 (m, 3H), 7.42-7.47 (m, 5H), 7.62-7.65 (m, 3H). <sup>13</sup>C NMR (CDCl<sub>3</sub>) 116.7 (CH), 119.7 (CH), 126.2 (CH), 128.5 (CH), 128.9 (C), 129.8 (CH), 129.9 (CH), 130.3 (CH), 130.4 (CH), 131.2 (CH), 134.3 (C), 134.4

(C), 135.3 (CH), 138.7 (C), 139.1 (CH), 139.9 (C), 152.4 (C).  $^{19}\text{F}$  NMR ( $\text{CDCl}_3$ ) -147.6 (m). Anal. Calcd. for  $\text{C}_{21}\text{H}_{15}\text{BF}_2\text{N}_2\text{S}_2$ : C, 61.78; H, 3.70. Found: C, 61.86; H, 3.85.

**4:** Red crystals, yield 19%, 20.5 mg; m.pt. 92-93°C;  $^1\text{H}$  NMR ( $\text{CDCl}_3$ )  $\delta$  5.79 (d, 2H,  $J = 4.8$  Hz), 6.98 (d, 2H,  $J = 4.14$  Hz), 7.22 (d, 1H,  $J = 7.56$  Hz), 7.25-7.27 (m, 2H), 7.36-7.37 (d, 2H,  $J = 8.22$  Hz), 7.40-7.44 (m, 6H), 7.65 (d, 2H,  $J = 8.64$  Hz).  $^{13}\text{C}$  NMR ( $\text{CDCl}_3$ )  $\delta$  118.5 (CH), 127.8 (CH), 128.1 (CH), 129.6 (CH), 129.7 (CH), 129.8 (CH), 129.9 (CH), 130.0 (CH), 133.3 (C), 135.0 (CH), 135.5 (C), 138.1 (C), 157.5 (C).  $^{19}\text{F}$  NMR ( $\text{CDCl}_3$ )  $\delta$  -147.5 (m). Anal. Calcd. for  $\text{C}_{27}\text{H}_{19}\text{BF}_2\text{N}_2\text{S}_3$ : C, 62.79; H, 3.71. Found: C, 61.41; H, 3.66. *Note: The isolated yield of the reaction was poor due to the presence of trace compounds with similar  $R_f$  values in the chromatography purification process.*

**5:** Orange crystals, yield 82%, 43.3 mg (0.17 mmol); m.p. 92-93°C;  $^1\text{H}$  NMR ( $\text{CDCl}_3$ )  $\delta$  1.40–1.42 (t, 3H,  $J = 7.74$  Hz), 3.34-3.38 (q, 2H,  $J = 7.56$ ), 6.51 (d, 2H,  $J = 4.14$  Hz), 7.41 (d, 2H,  $J = 4.14$  Hz), 7.79 (s, 2H).  $^{13}\text{C}$  NMR ( $\text{CDCl}_3$ )  $\delta$  14.9 ( $\text{CH}_3$ ), 32.5 ( $\text{CH}_2$ ), 118.0 (CH), 128.5 (CH), 135.1 (C), 142.2 (CH), 151.4 (C).  $^{19}\text{F}$  NMR ( $\text{CDCl}_3$ ) -145.8 (m). Anal. Calcd. for  $\text{C}_{11}\text{H}_{11}\text{BF}_2\text{N}_2\text{S}$ : C, 52.41; H, 4.40. Found: C, 52.74; H, 4.25.

The new compounds were characterized by NMR spectroscopy using a Bruker 600 MHz NMR; UV-vis spectroscopy recorded in a Cary 50 spectrometer; fluorescence spectroscopy recorded on an Olis DM 45 fluorometer. Rhodamine B ( $\Phi = 0.70$  in ethanol) and cresyl violet perchlorate ( $\Phi = 0.54$  in ethanol) were used as standards for the calculation of the quantum yields.

| Solvent | <b>2</b>                        |                                               |                                |        | <b>3</b>                        |                                               |                                |        | <b>4</b>                        |                                               |                                |        |
|---------|---------------------------------|-----------------------------------------------|--------------------------------|--------|---------------------------------|-----------------------------------------------|--------------------------------|--------|---------------------------------|-----------------------------------------------|--------------------------------|--------|
|         | $\lambda_{\text{max}}$ Abs (nm) | $\epsilon$ ( $\text{M}^{-1} \text{cm}^{-1}$ ) | $\lambda_{\text{max}}$ Em (nm) | $\phi$ | $\lambda_{\text{max}}$ Abs (nm) | $\epsilon$ ( $\text{M}^{-1} \text{cm}^{-1}$ ) | $\lambda_{\text{max}}$ Em (nm) | $\phi$ | $\lambda_{\text{max}}$ Abs (nm) | $\epsilon$ ( $\text{M}^{-1} \text{cm}^{-1}$ ) | $\lambda_{\text{max}}$ Em (nm) | $\phi$ |
| Hexane  | 497                             | 24,000                                        | 542                            | 0.61   | 554                             | 83,000                                        | 593                            | 0.39   | 609                             | 63,000                                        | 630                            | 0.24   |
| DCM     | 495                             | 24,000                                        | N.D.                           |        | 551                             | 83,000                                        | 598                            | 0.05   | 609                             | 57,500                                        | 634                            | 0.23   |
| THF     | 493                             | 21,000                                        | N.D.                           |        | 553                             | 74,000                                        | 598                            | 0.05   | 609                             | 51,000                                        | 632                            | 0.22   |
| Acetone | 493                             | 23,000                                        | N.D.                           |        | 548                             | 69,000                                        | 595                            | 0.02   | 603                             | 50,000                                        | 628                            | 0.18   |
| MeOH    | 497                             | 24,000                                        | N.D.                           |        | 545                             | 75,000                                        | 593                            | 0.02   | 603                             | 49,000                                        | 628                            | 0.19   |

Table 1. Summary of the optical properties of BODIPYs 2-4.

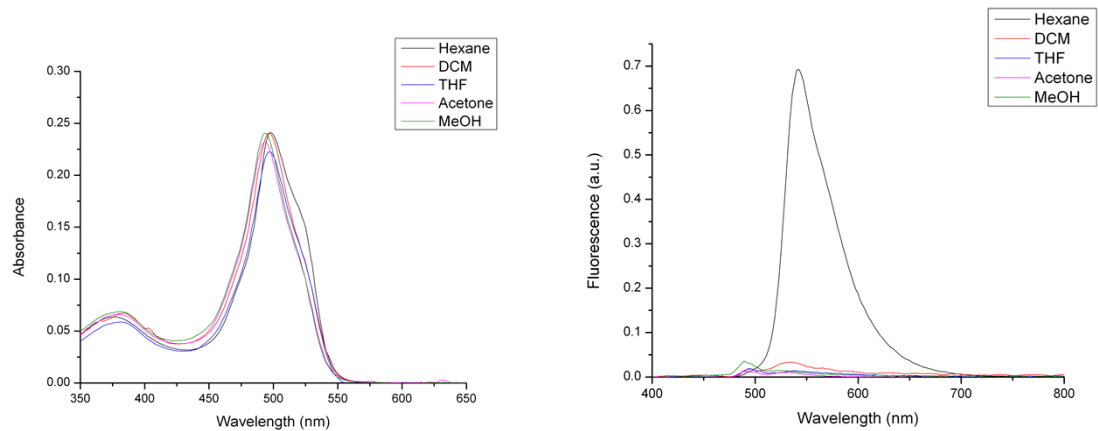

Figure 1. Absorbance (left) and emission spectra of **2**

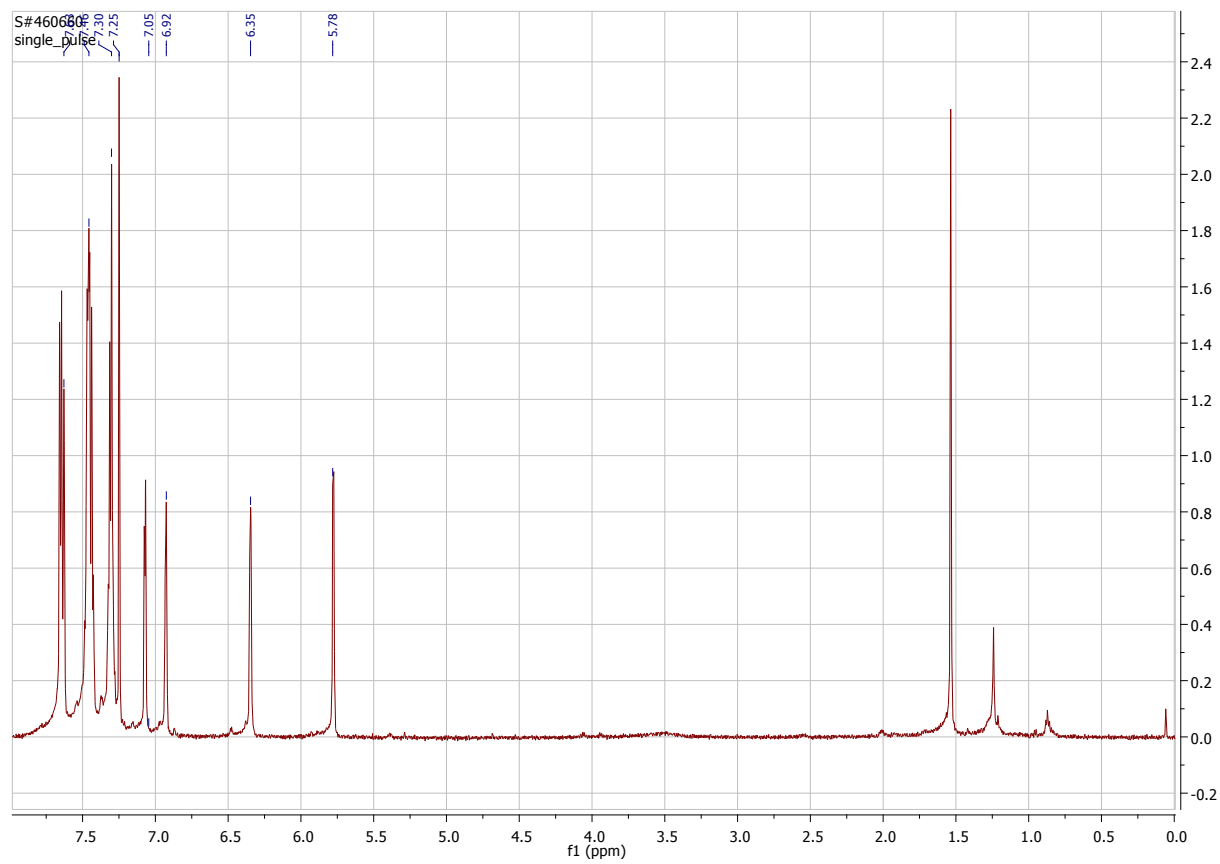

**Figure 2.** 3,8-bis(phenylthio)BODIPY **3**;  $^1\text{H}$  NMR

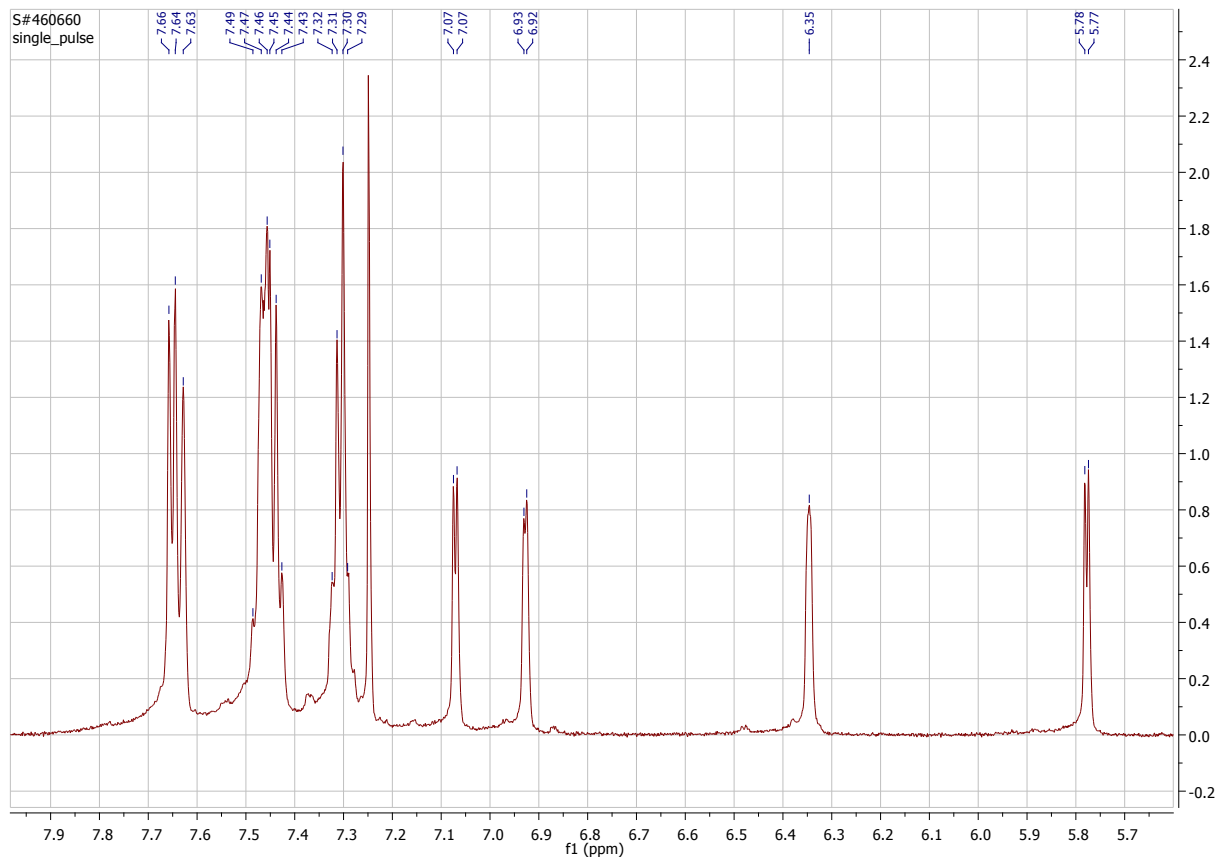

**Figure 3.** 3,8-bis(phenylthio)BODIPY **3**;  $^1\text{H}$  NMR expanded

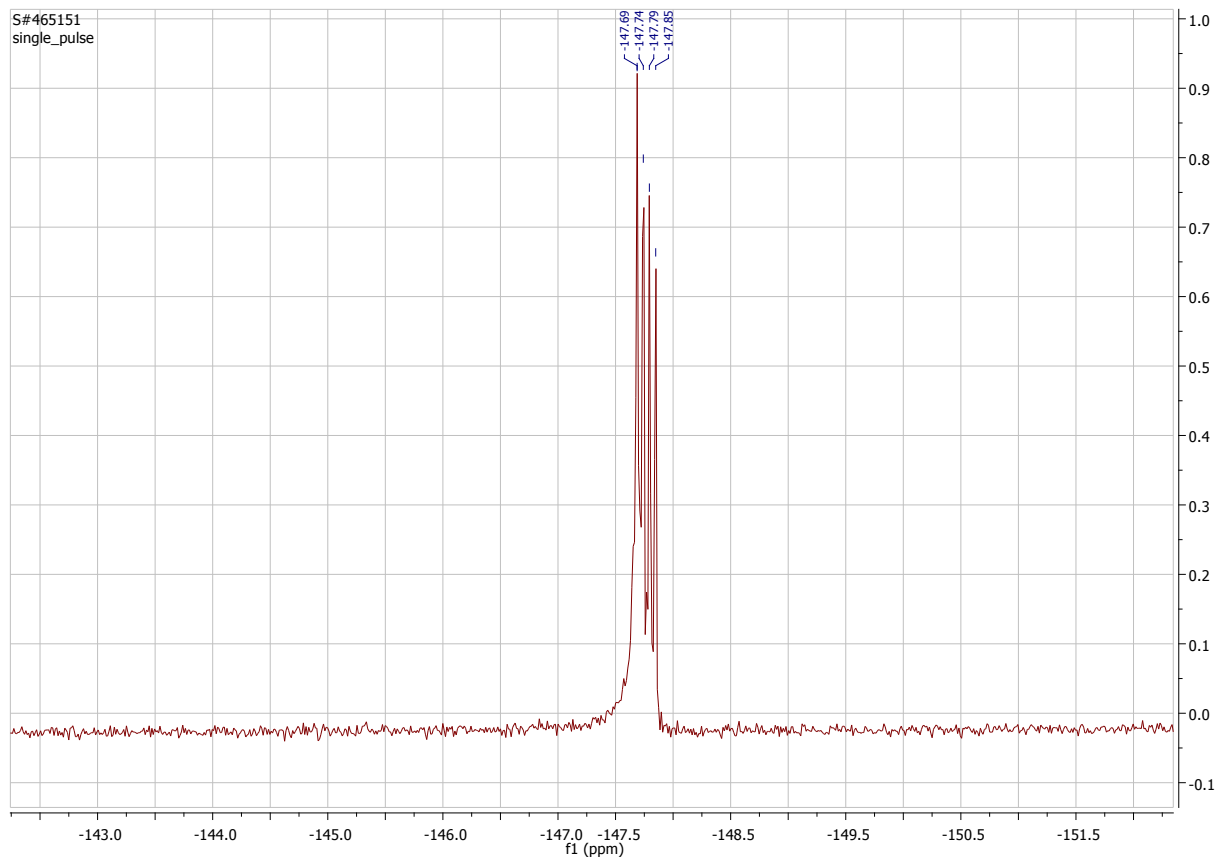

**Figure 4.** 3,8-bis(phenylthio)BODIPY **3**;  $^{19}\text{F}$  NMR



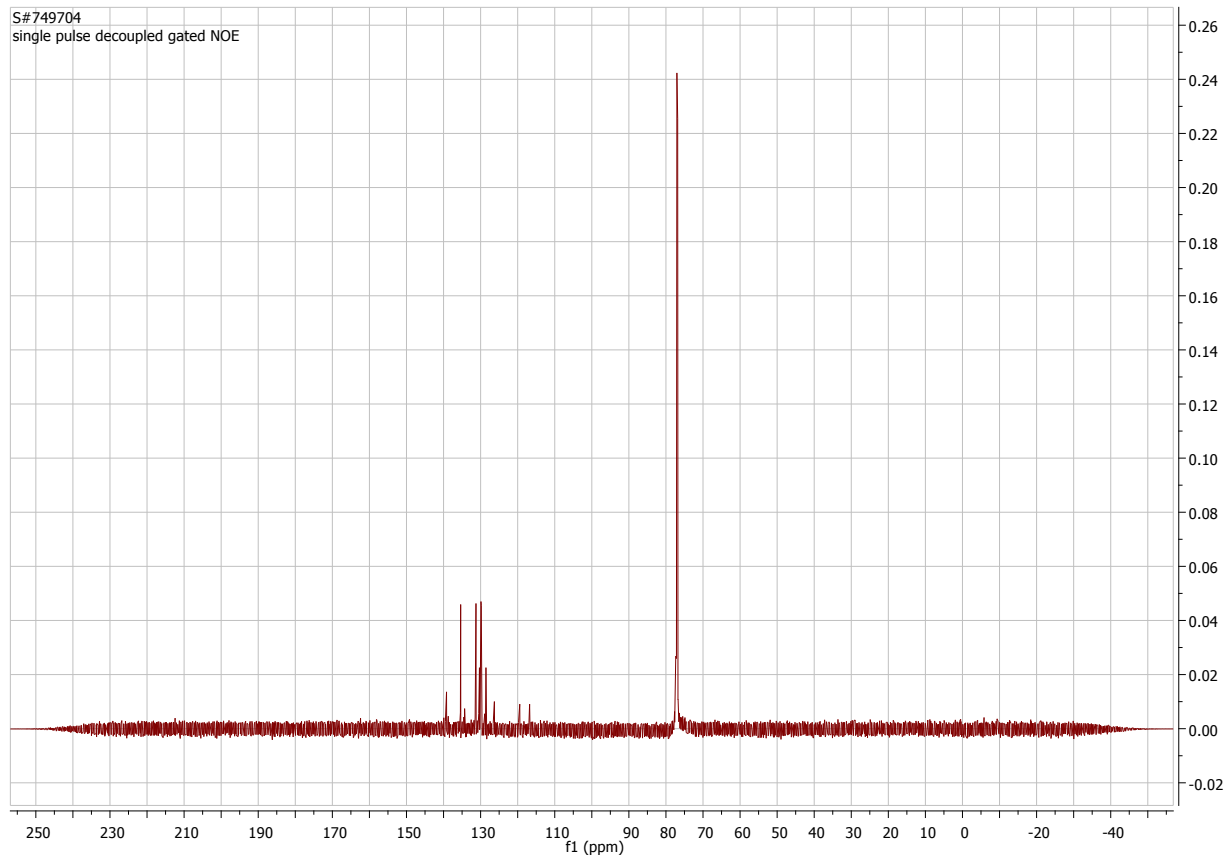

**Figure 5.** 3,8-bis(phenylthio)BODIPY **3**;  $^{13}\text{C}$  NMR

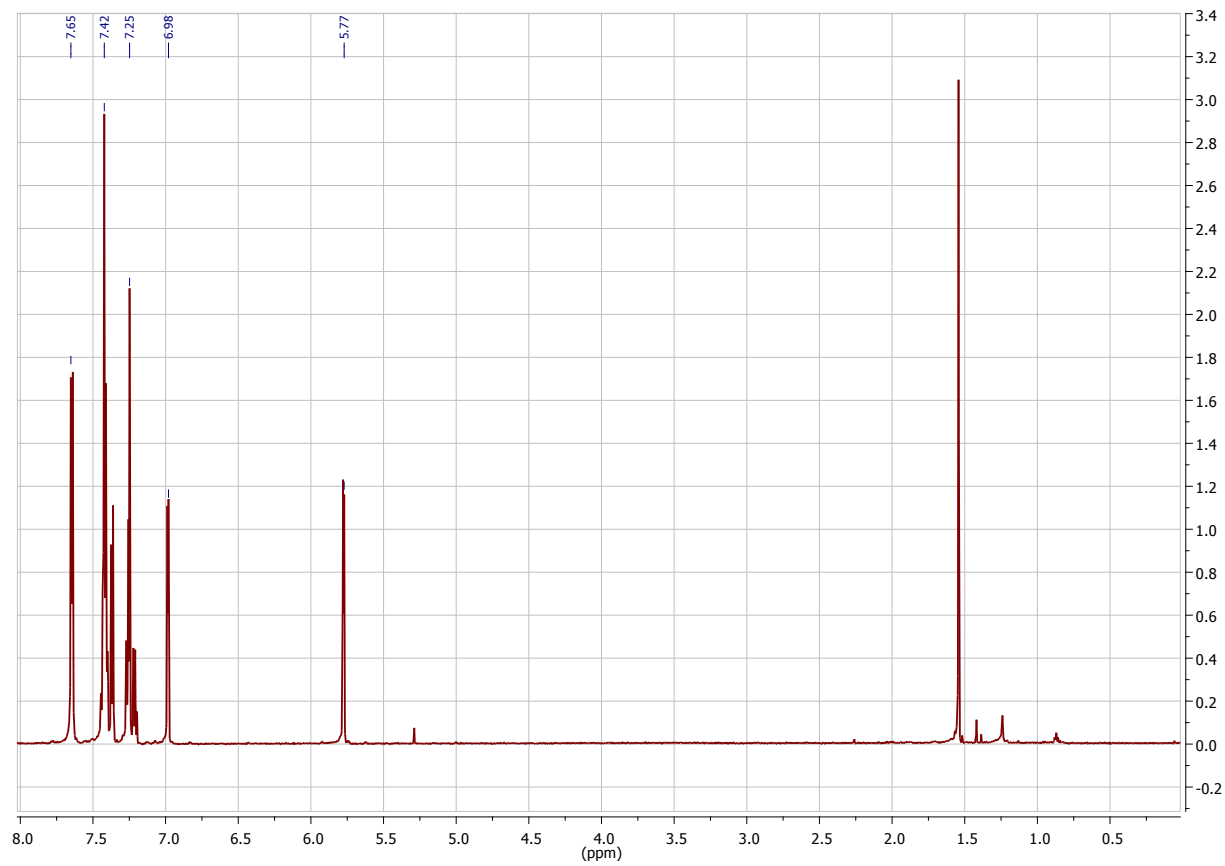

**Figure 6.** 3,8-bis(phenylthio)BODIPY **4**; <sup>1</sup>H NMR

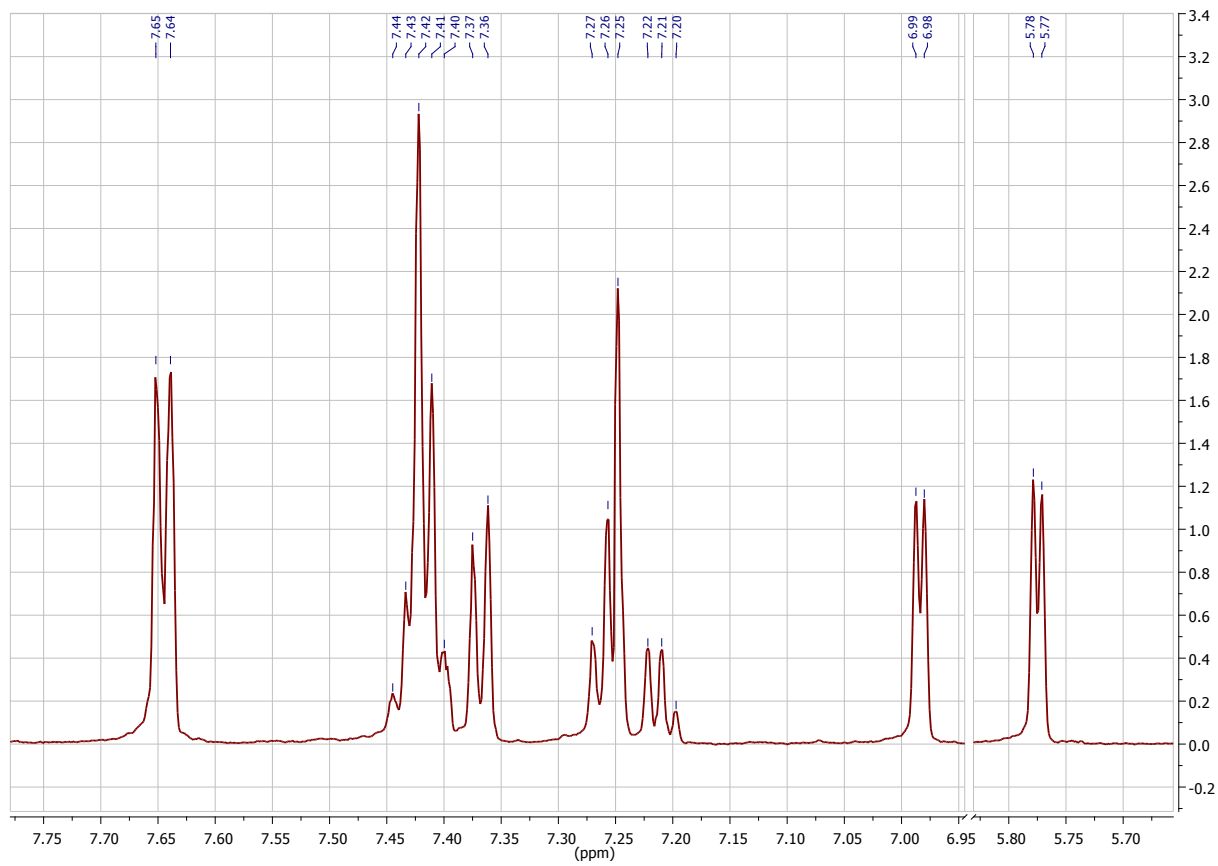

**Figure 7.** 3,5,8-tris(phenylthio)BODIPY **4**; <sup>1</sup>H NMR expanded.

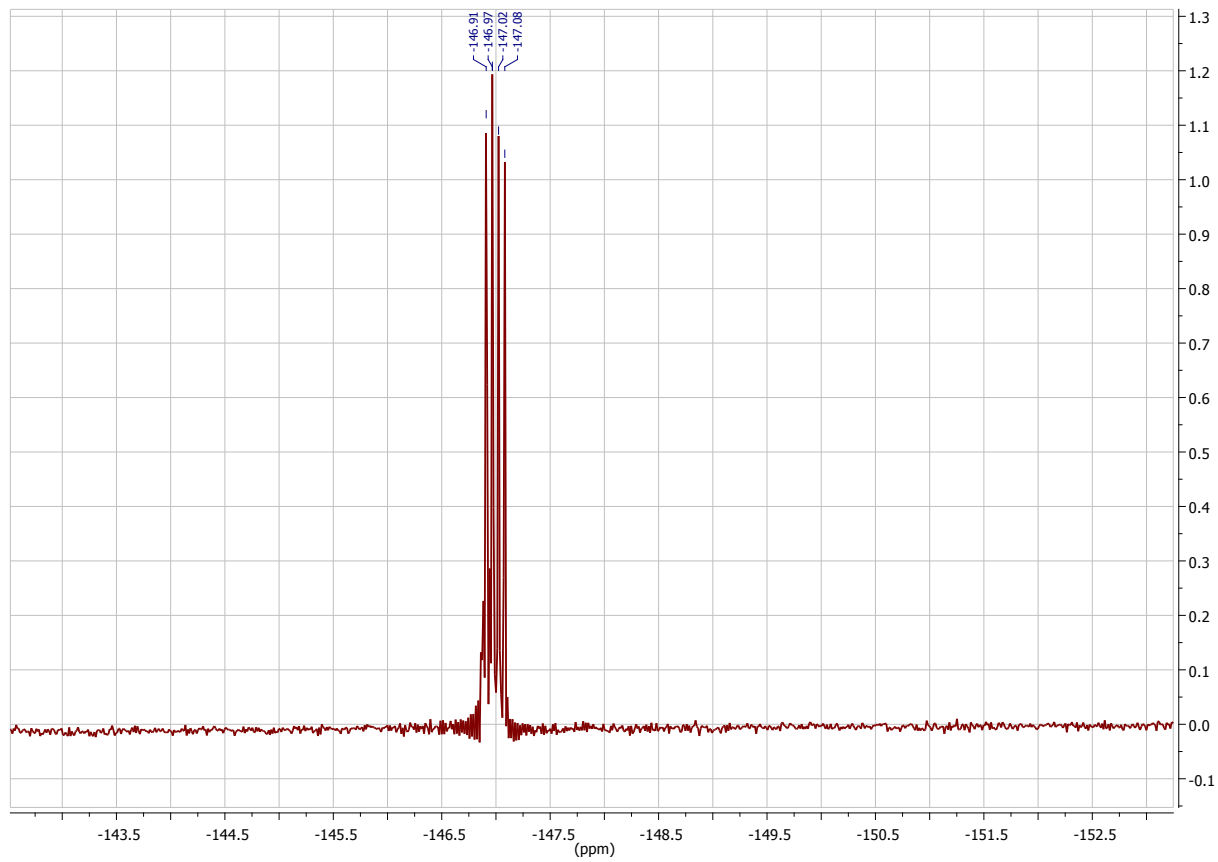

**Figure 8.** 3,5,8-tris(phenylthio)BODIPY 4;  $^{19}\text{F}$  NMR

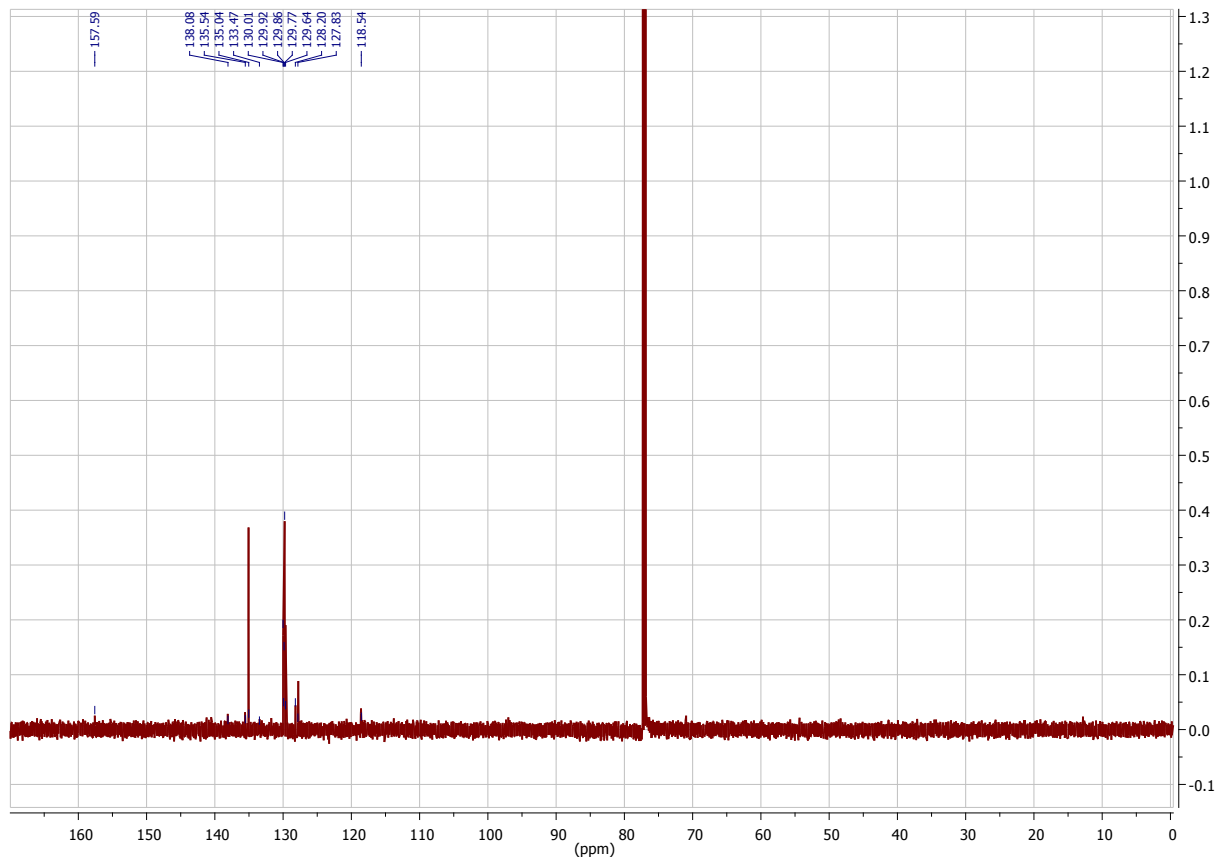

**Figure 9.** 3,5,8-tris(phenylthio)BODIPY 4;  $^{13}\text{C}$  NMR

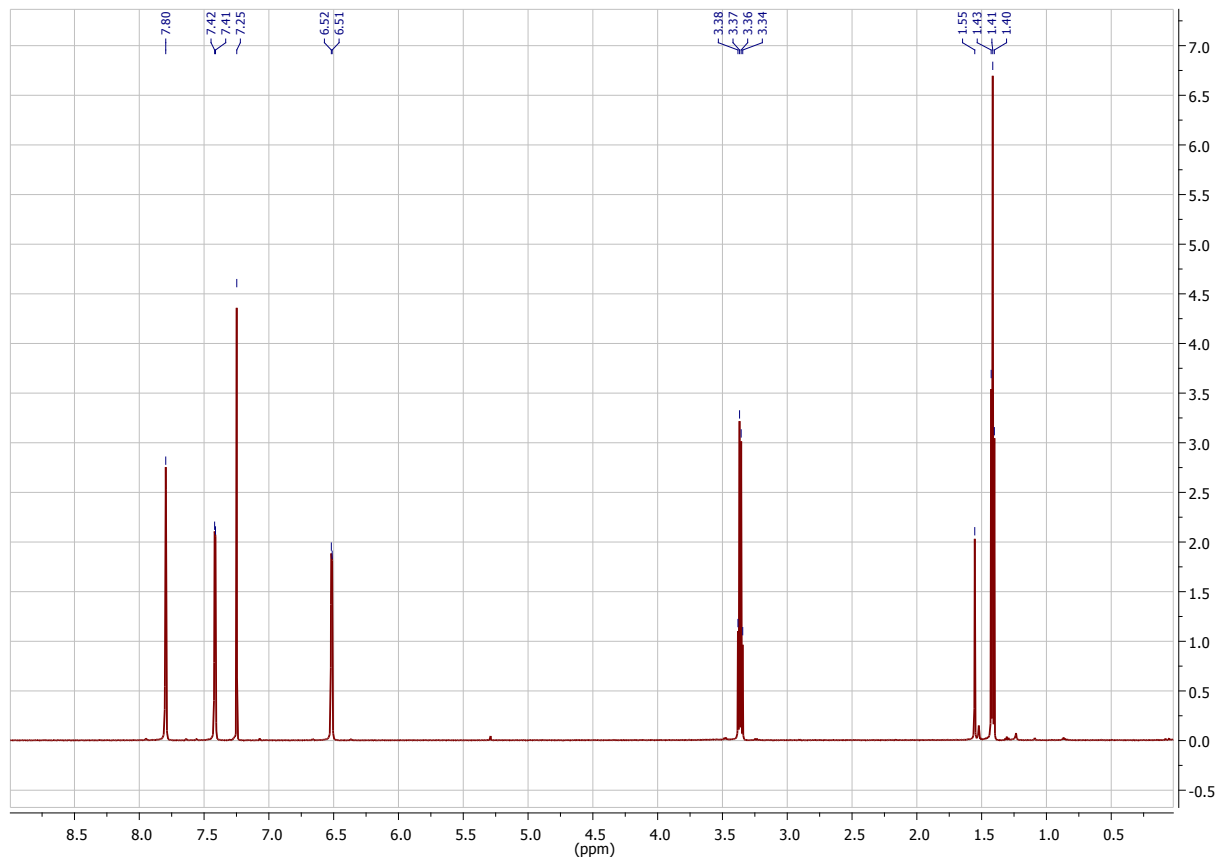

Figure 10. 8-ethylthio-BODIPY 5,  $^1\text{H}$  NMR

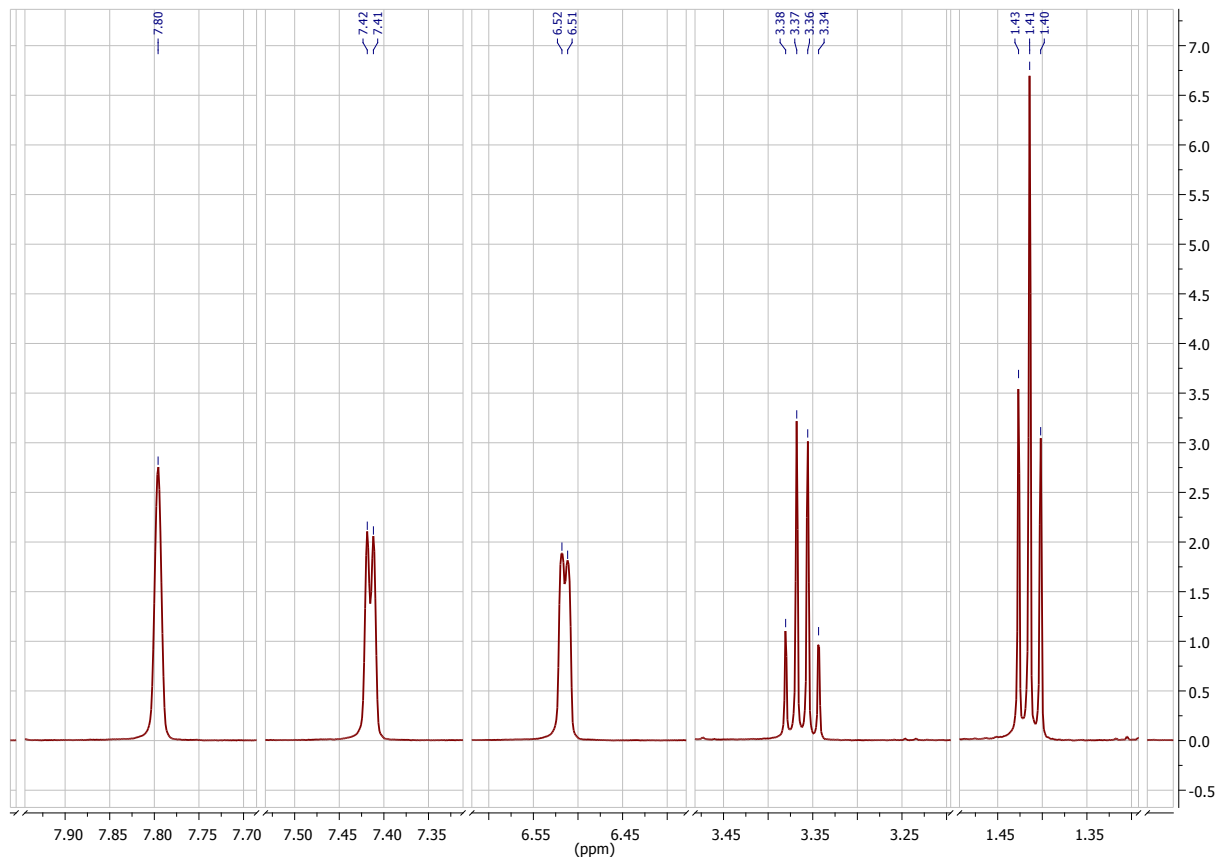

**Figure 11.** 8-ethylthio-BODIPY 5,  $^1\text{H}$  NMR zoom

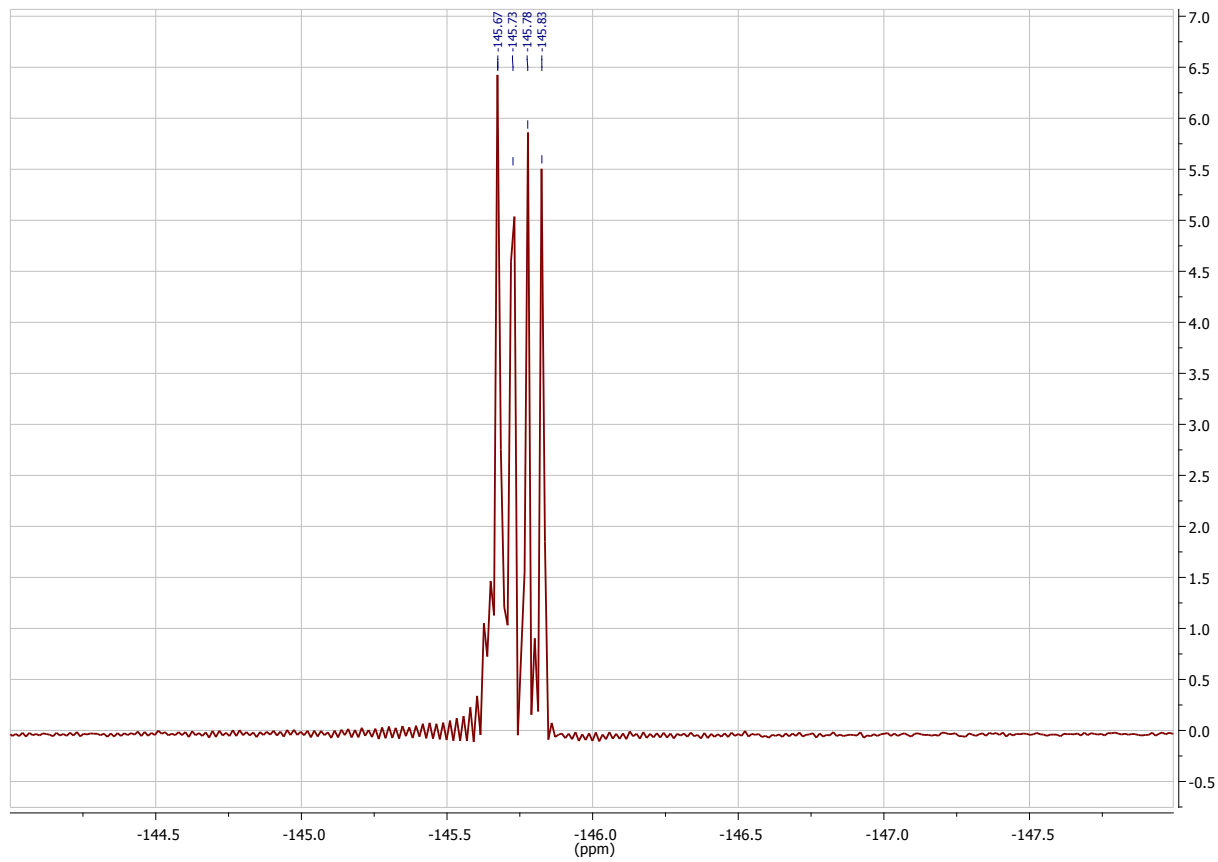

**Figure 12.** 8-ethylthio-BODIPY 5,  $^{19}\text{F}$  NMR



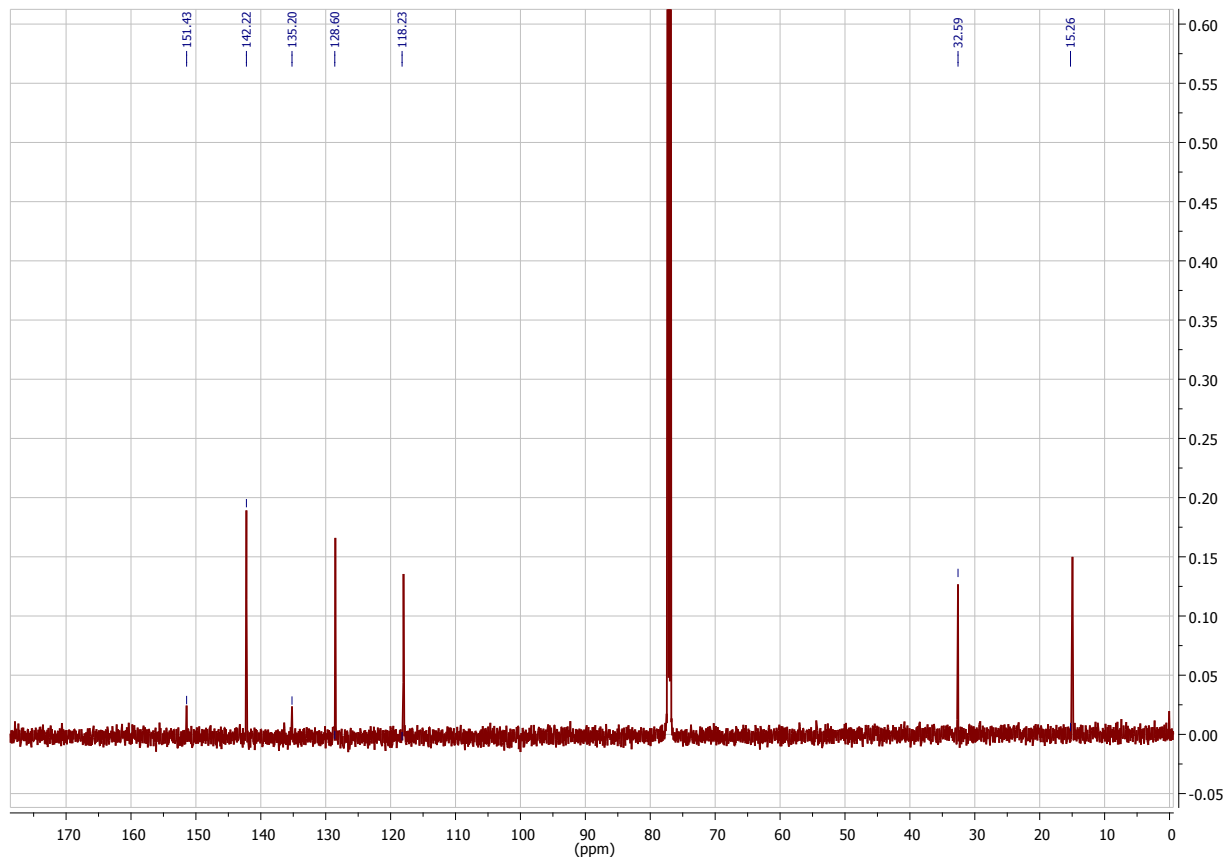

Figure 13. 8-ethylthio-BODIPY 5,  $^{13}\text{C}$  NMR

## Crystal Packing aspects of 2, 3 and 4

In the case of the monothio BODIPY **2**, in the crystal structure can be observed the formation of ribbons or chains by the HB between the F atoms and two hydrogens in the aromatic ring (F1...H13 [2.635 Å] and F2...H11 [2.395 Å], Figure9). These chains are then interlinked by more HB through the F atoms (F1...H12 [2.514 Å] and F2...H1 [2.440 Å]) generating a 2-D structure (Figure9).

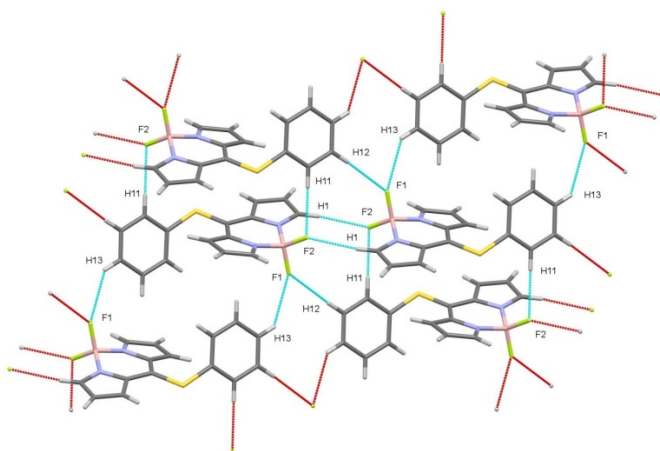

Figure 14

On the other hand, the presence of the second phenyl ring on the bis-adduct **3** blocks the interactions with the hydrogen on the bodipy core generating a chain motif along axis *b* through F2...H11 [2.605 Å] and F2...H20 [2.558 Å], Figure10a. Another structural change in the crystal is the formation of dimers (Figure10b), not observed in the mono-adduct, with a distance of 3.493 Å between the mean planes of each bodipy with a close interaction of the F and S atoms of 3.054 Å, probably the driving force, because that distance is shorter than the Van der Waal's distance by 0.216 Å. This F...S interactions interlock chain motifs generating a 2-D structure.

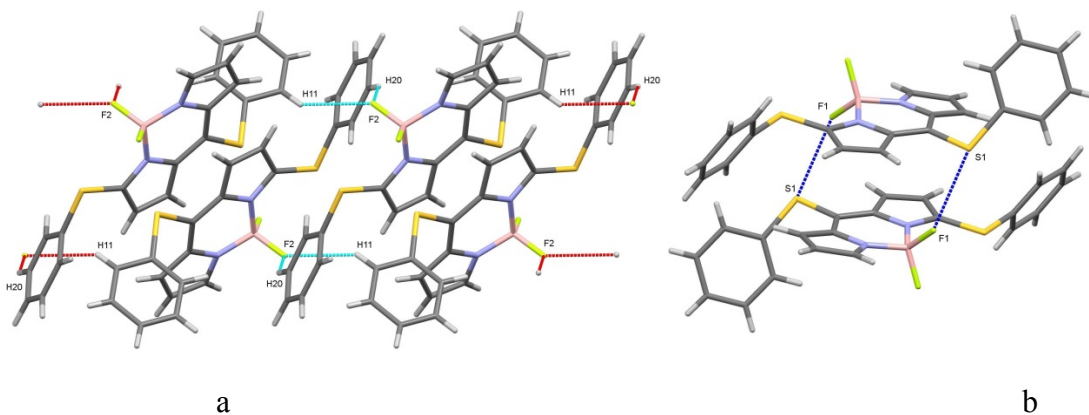

Figure 15

In the case of the tris adduct, **4**, the formation of dimers is also observed (Figure 11), the distance between them (mean planes) is 3.531 Å, as expected a little longer than the bis adduct due to the increased molecular volume. Due to the same reason the F⋯S interactions are slightly longer (3.158 Å), but still below the sum of VdW radii by 0.112 Å. But in this molecule, the F⋯S interaction is not necessary as in the bis-adduct to expand the order of the architecture to 2-D, but they are collaborating with the F⋯H network, F1⋯H25 [2.551 Å], F2⋯H26 [2.464 Å], Figures 12 and 13.

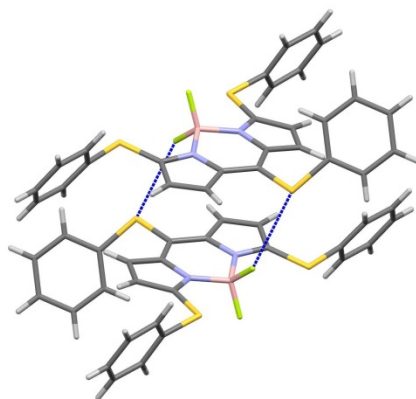

**Figure 16.** Dimer for **4**

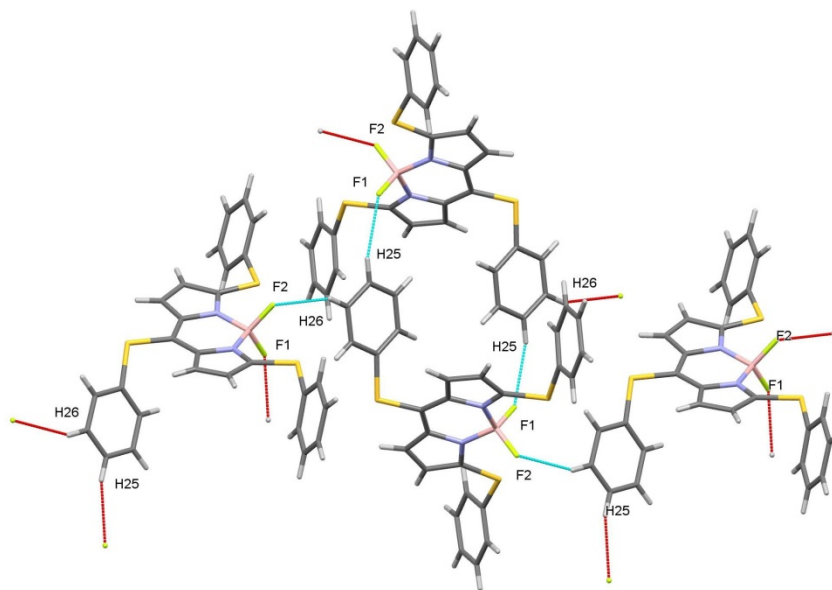

**Figure 17.** Partial HB network generated from a central molecule of **4**

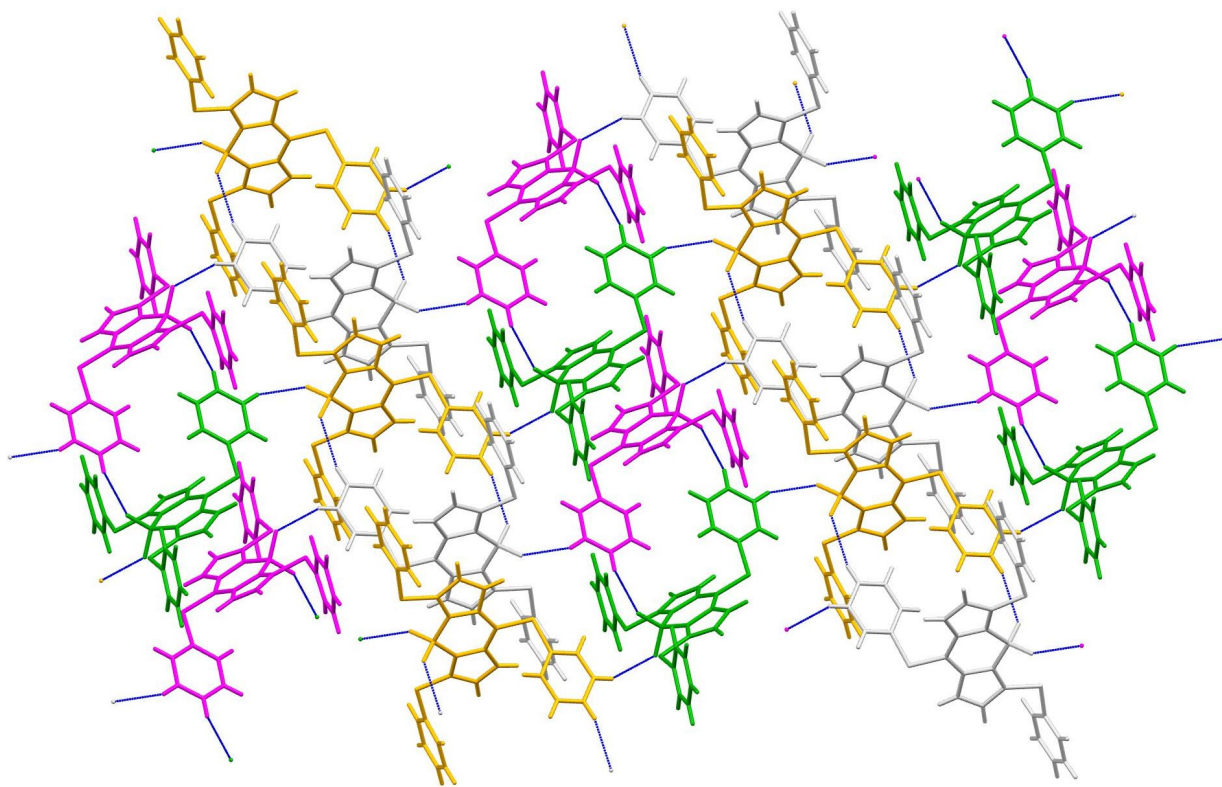

**Figure 18.** HB network molecules of **4** in different color to increase clarity
